# Supplementary material
Source: PubMed Central journal article supplement (PMC3963524)

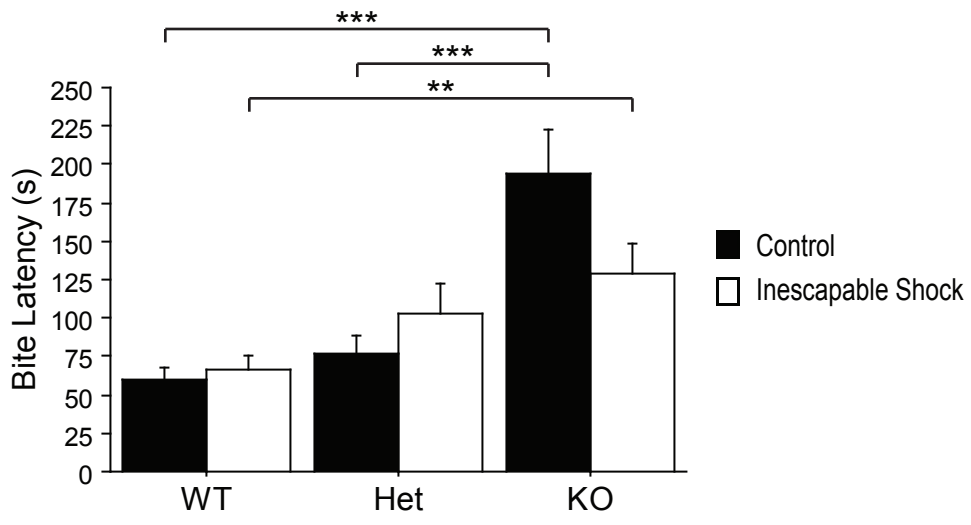

Supplement: NIHMS237268-supplement-Supp_Fig_S1.pdf [file NIHMS237268-supplement-Supp_Fig_S1.pdf]
